# Supplementary material
Source: PubMed Central journal article supplement (PMC5349472)

# Supplementary Figure 1

a

|                 | <i>ced-1(e1735)</i> | <i>ced-1(e1735);<br/>ufd-2(tm1380)</i> |
|-----------------|---------------------|----------------------------------------|
| Corpses         | 10.05               | 11.21                                  |
| s.e.m.          | 0.43                | 0.50                                   |
| <i>P</i> -value | -                   | n.s.                                   |

b

|                   | wt   | <i>ufd-2(tm1380)</i> | <i>gla-3(op216)</i> | <i>gla-3(op216);<br/>ufd-2(tm1380)</i> |
|-------------------|------|----------------------|---------------------|----------------------------------------|
| Corpses/ germline | 0.91 | 0.73                 | 10.56               | 10.07                                  |
| s.e.m.            | 0.17 | 0.12                 | 0.56                | 0.62                                   |
| <i>P</i> -value   | -    | n.s.                 | ***                 | ***                                    |

c

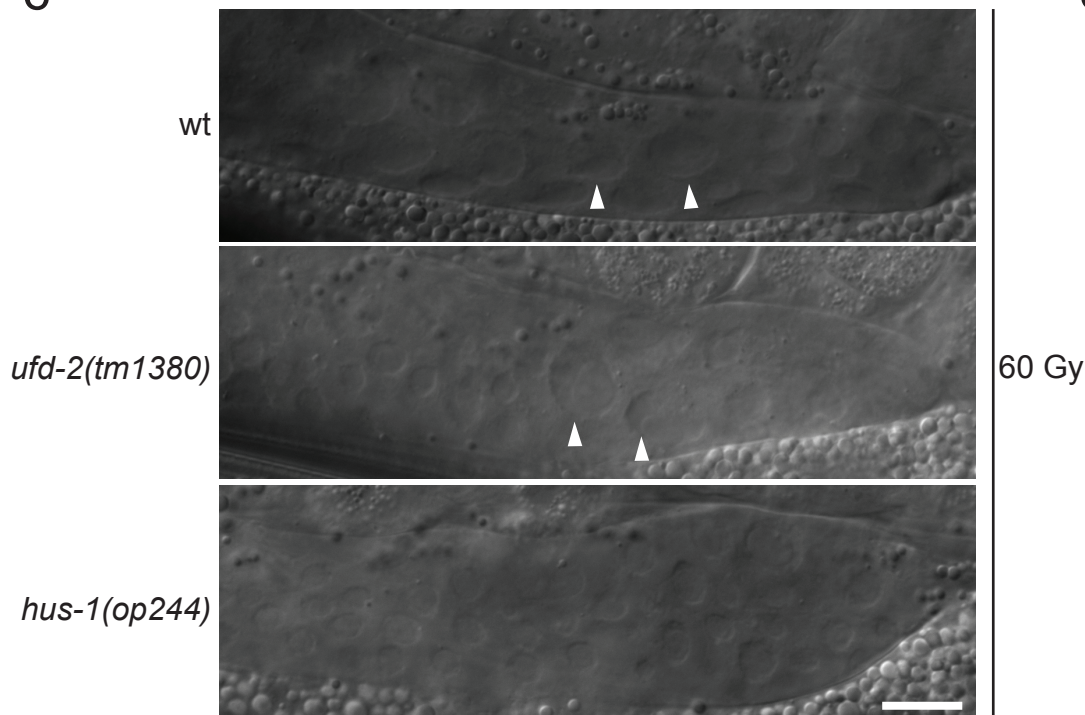

d

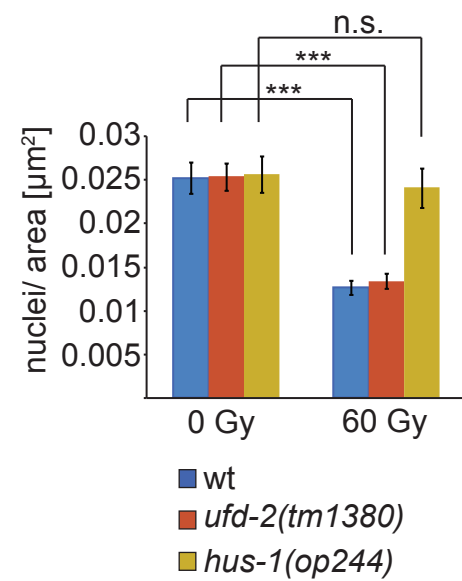

e

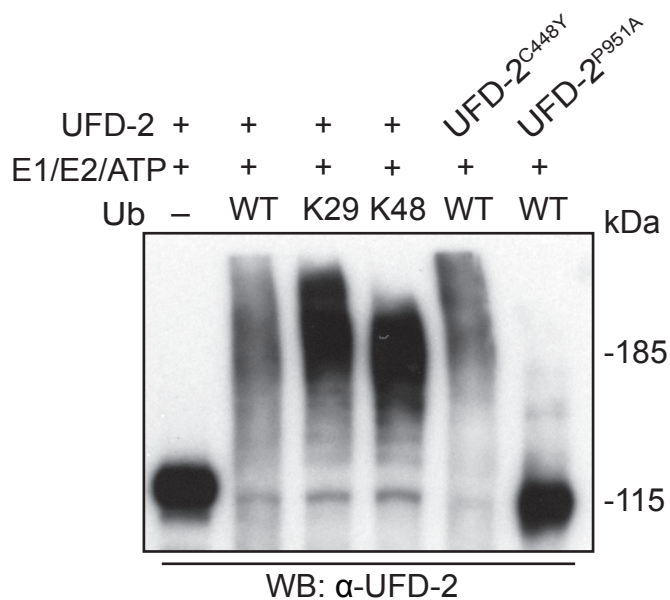

# Supplementary Figure 2

a

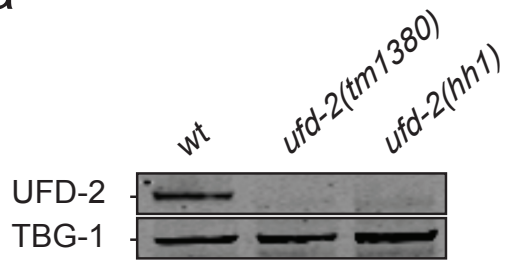

b

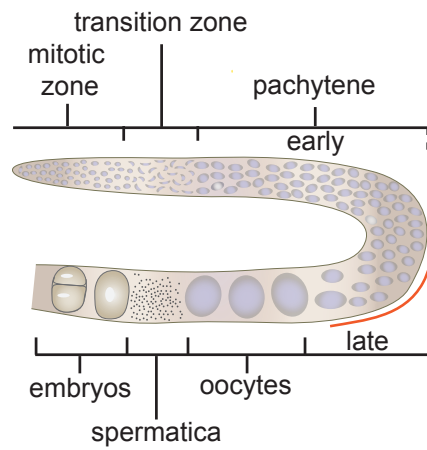

z-slide a

z-slide b

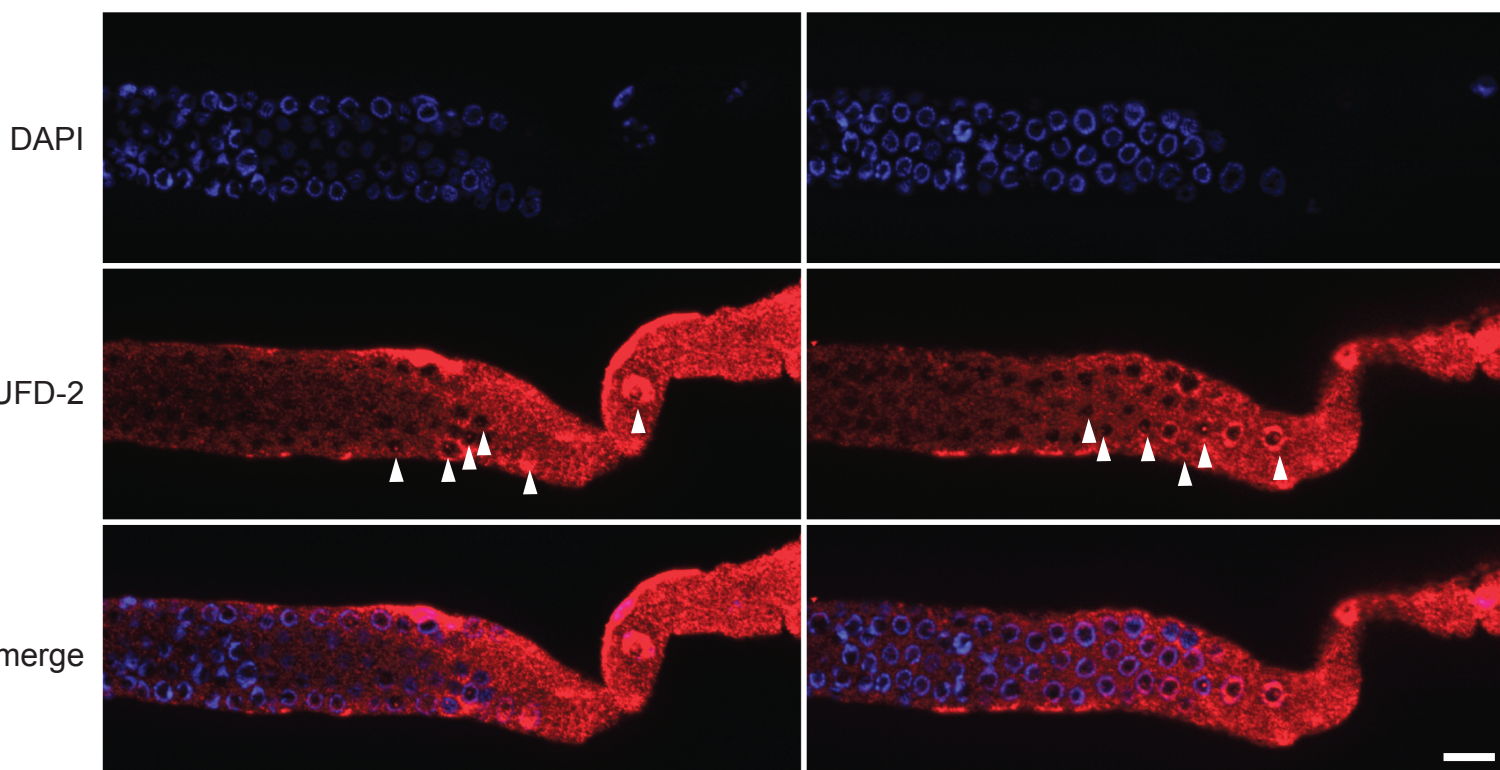

c

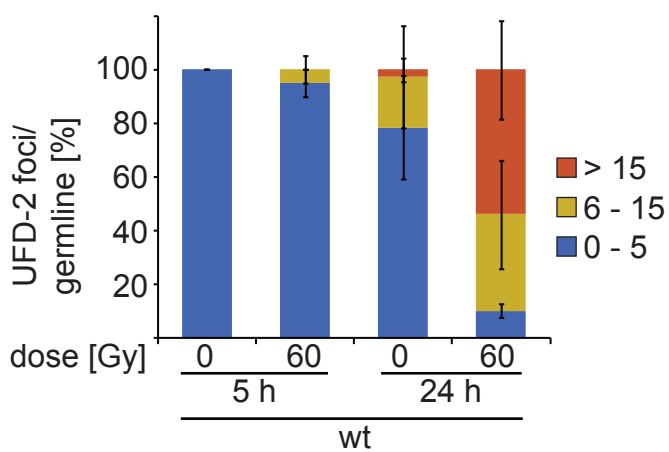

# Supplementary Figure 3

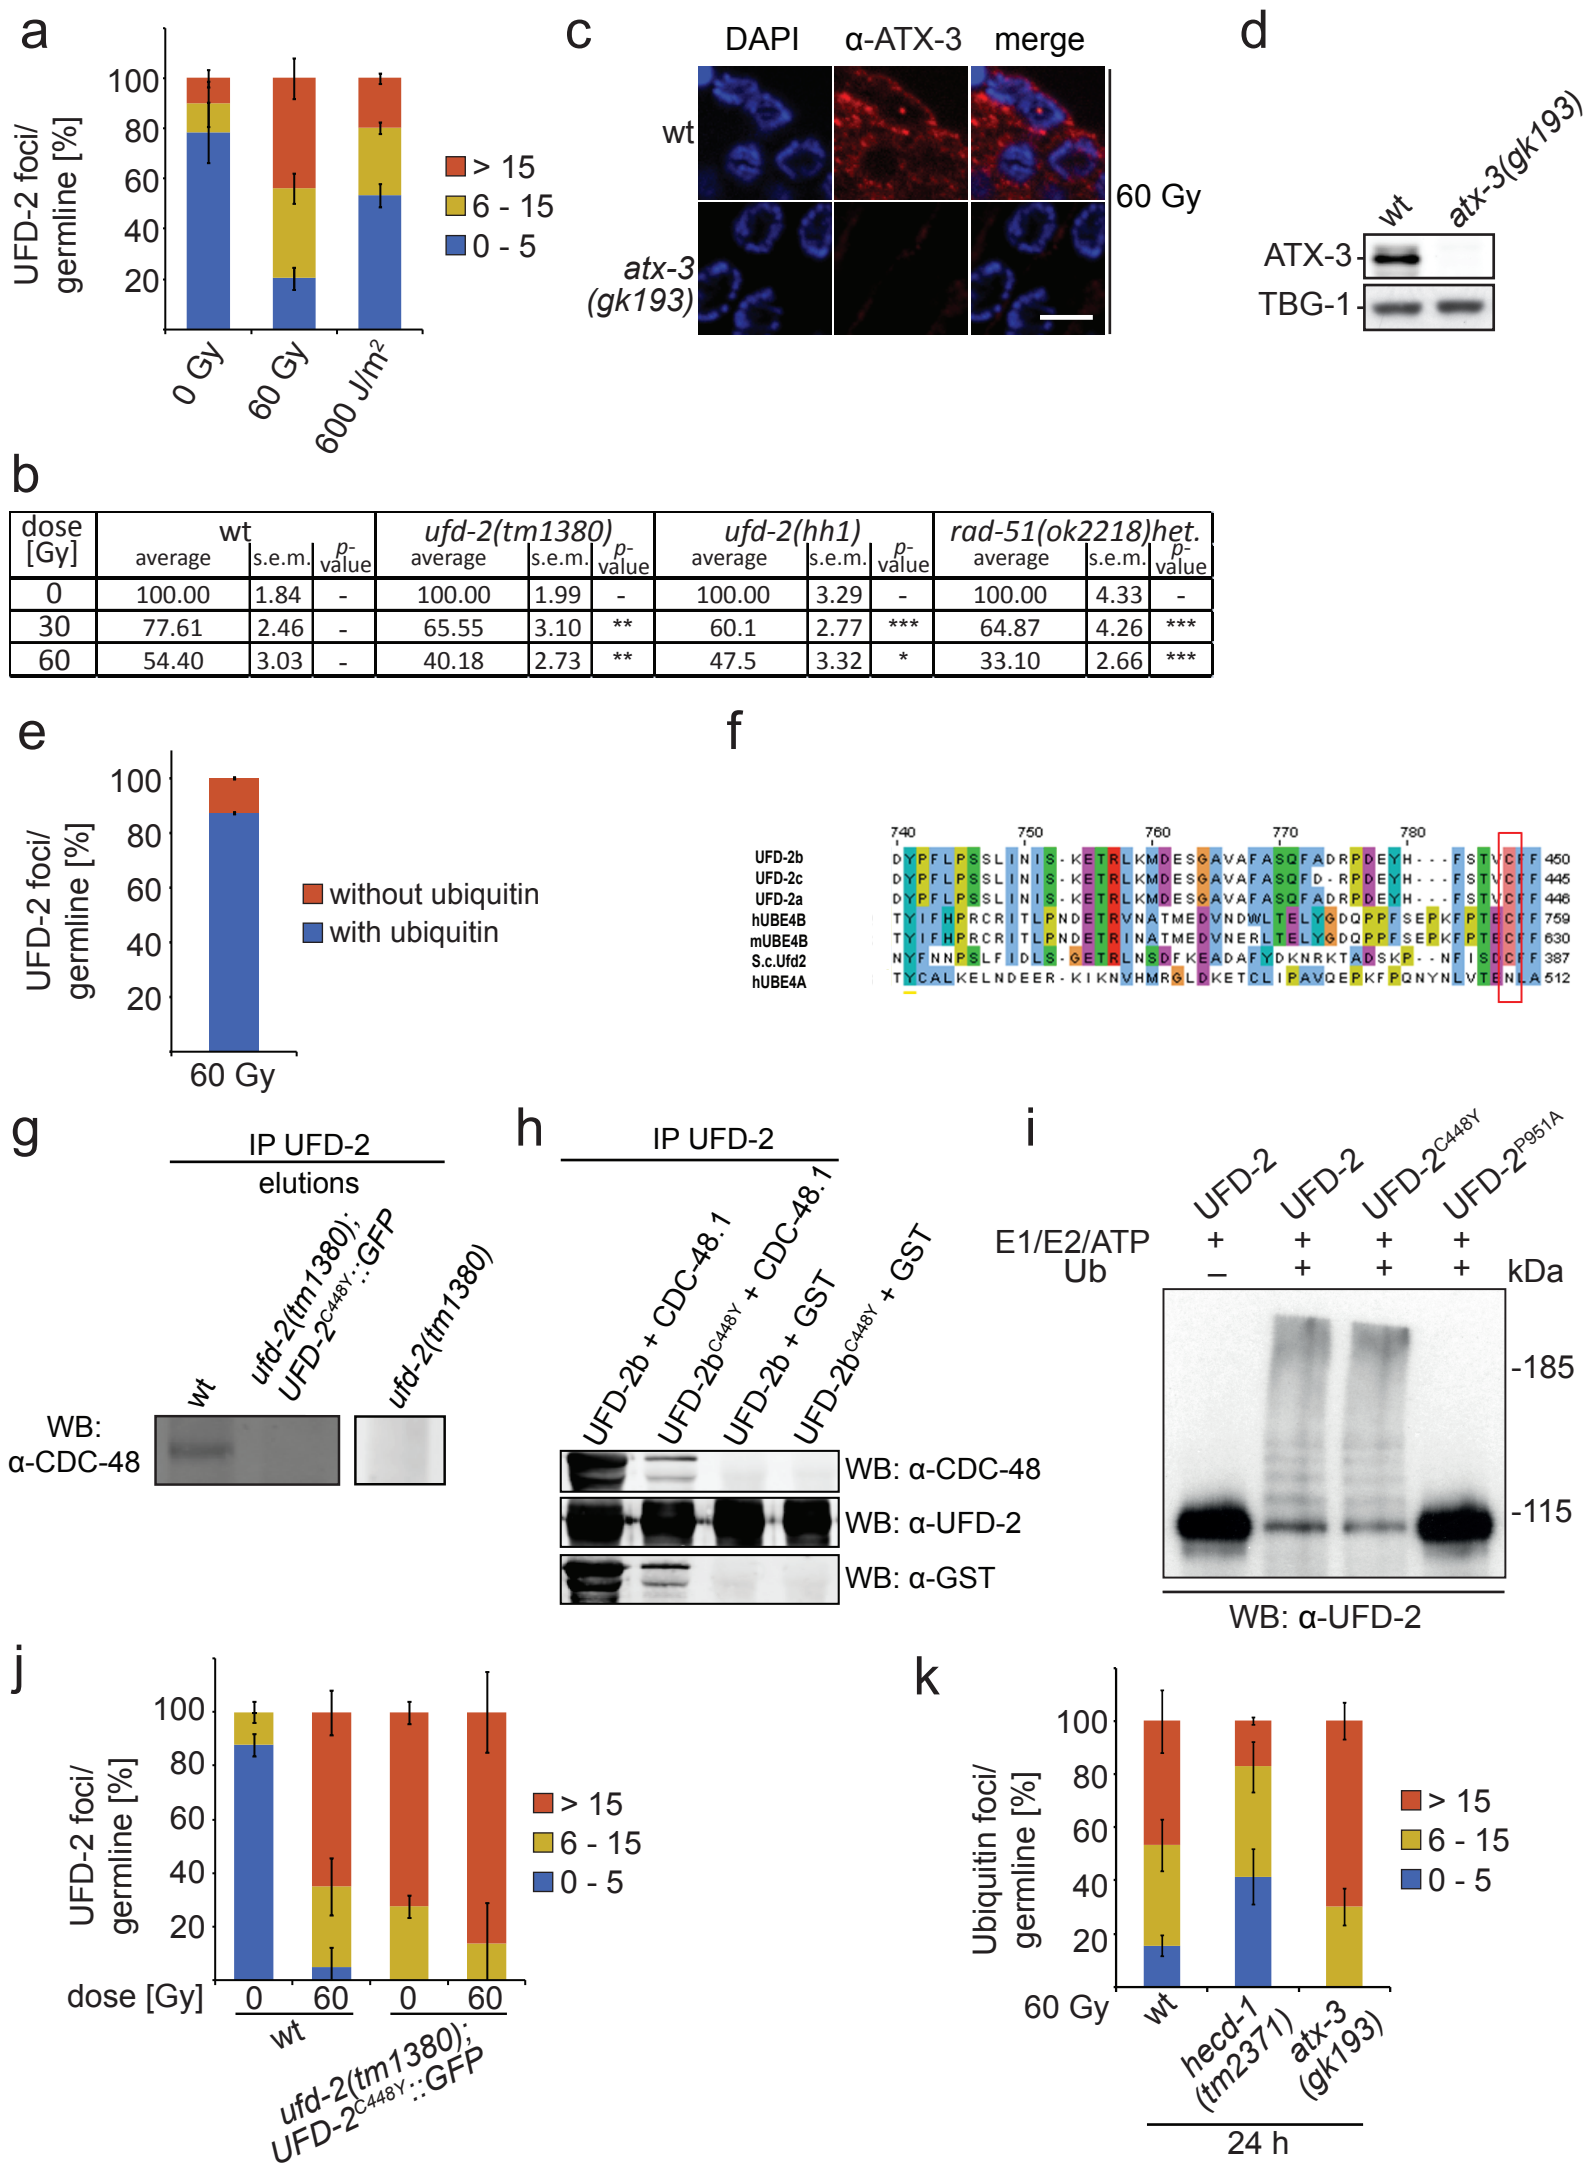

# Supplementary Figure 4

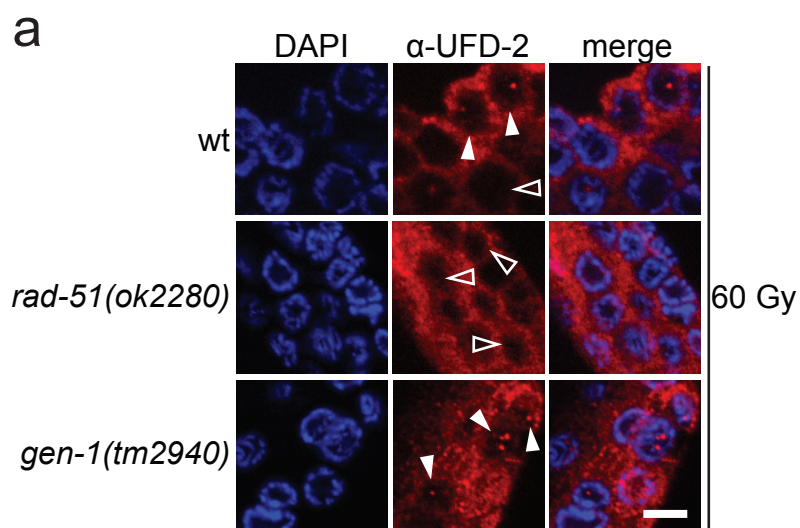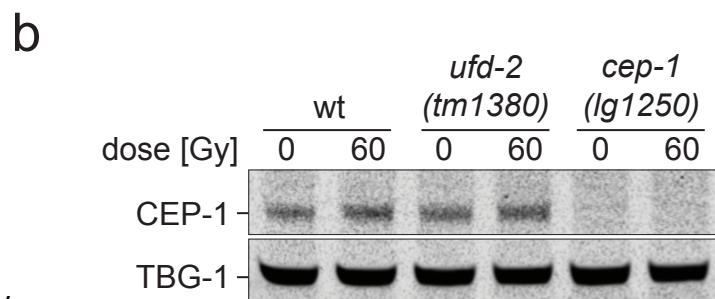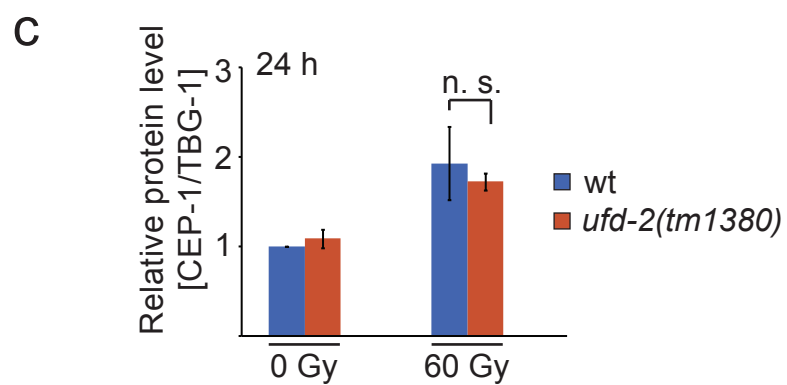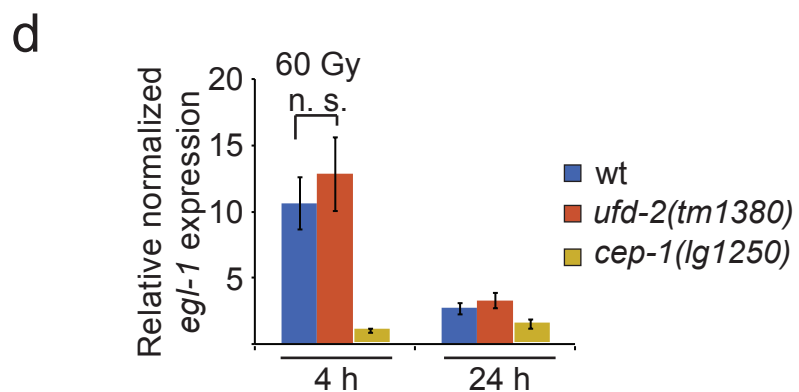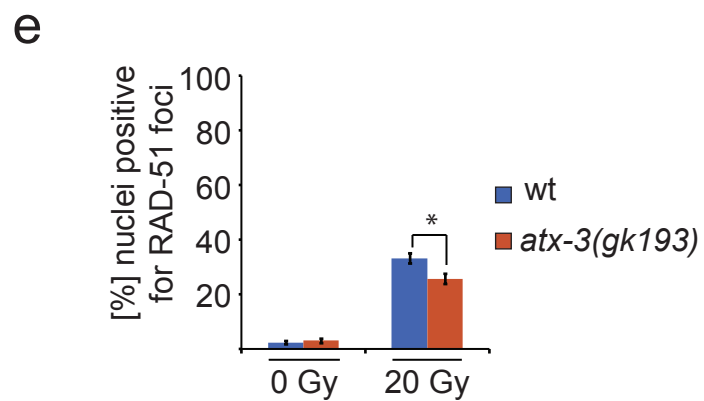

# Supplementary Figure 5

a

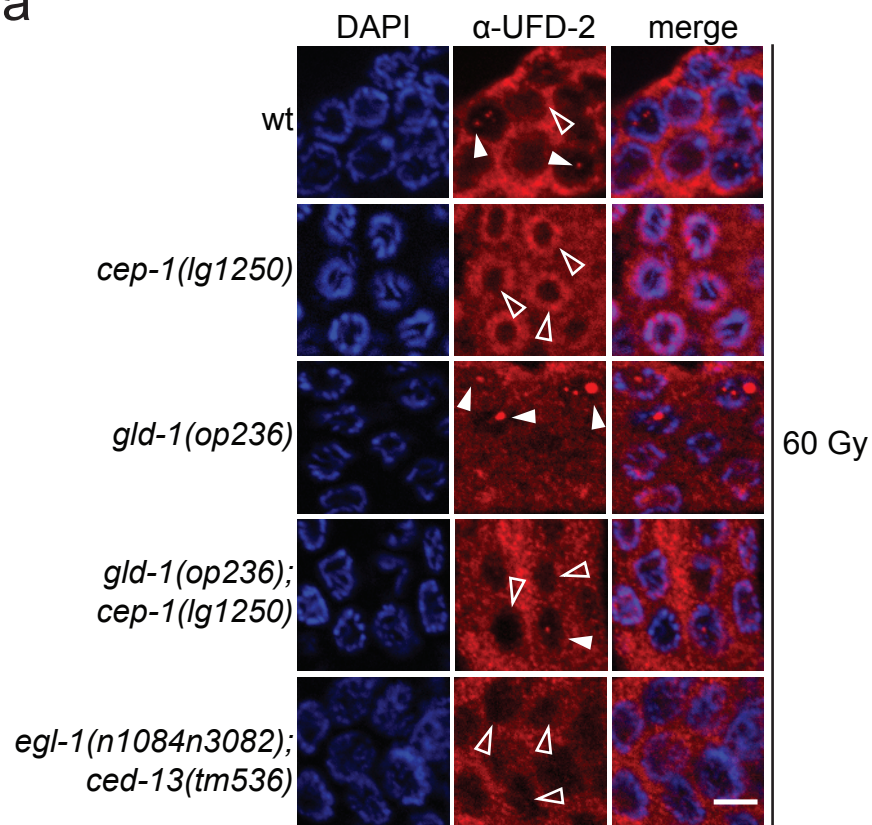

b

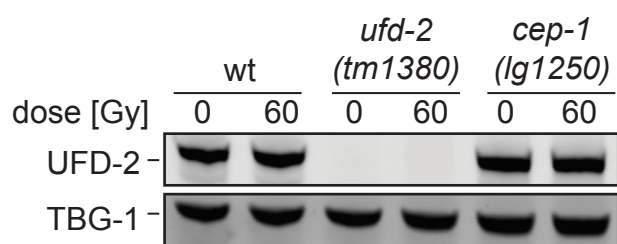

c

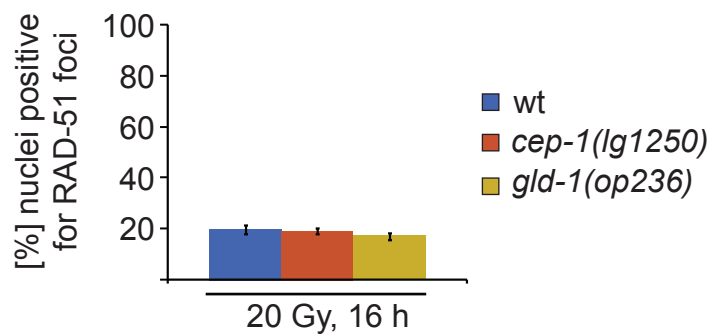

# Supplementary Figure 6

a

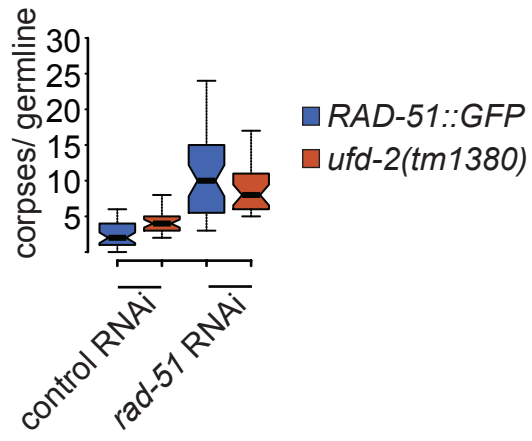

b

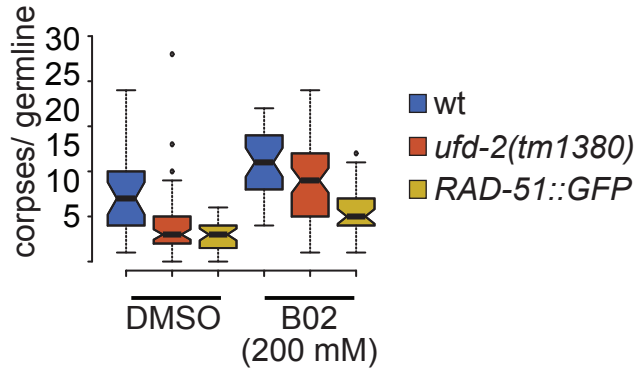

c

| dose<br>[Gy] | wt      |        |         | <i>RAD-51::GFP</i> |        |         | <i>rad-51(ok2218) het.</i> |        |         |
|--------------|---------|--------|---------|--------------------|--------|---------|----------------------------|--------|---------|
|              | average | s.e.m. | p-value | average            | s.e.m. | p-value | average                    | s.e.m. | p-value |
| 0            | 100,00  | 0,18   | -       | 100,00             | 0,68   | -       | 100,00                     | 2,15   | -       |
| 60           | 70,71   | 2,68   | -       | 65,86              | 3,57   | n.s.    | 44,52                      | 1,83   | ***     |

# Supplementary Figure 7

a

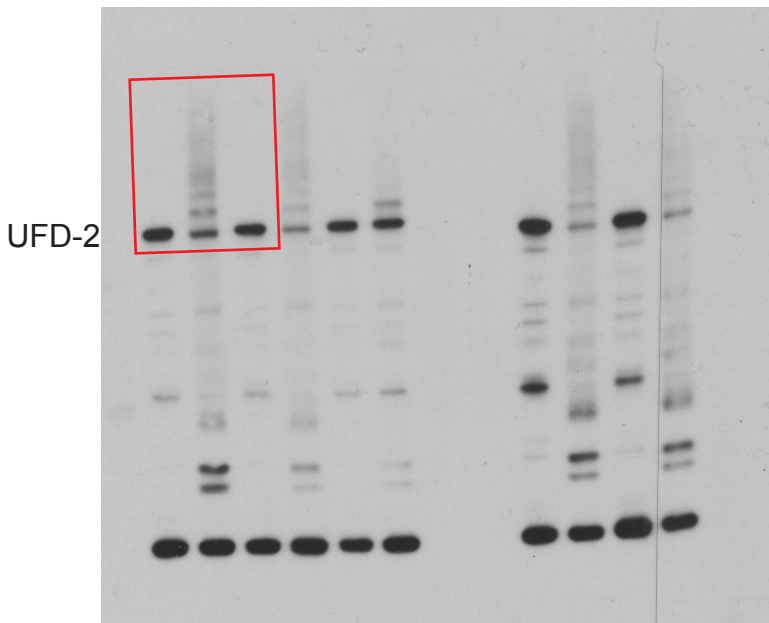

b

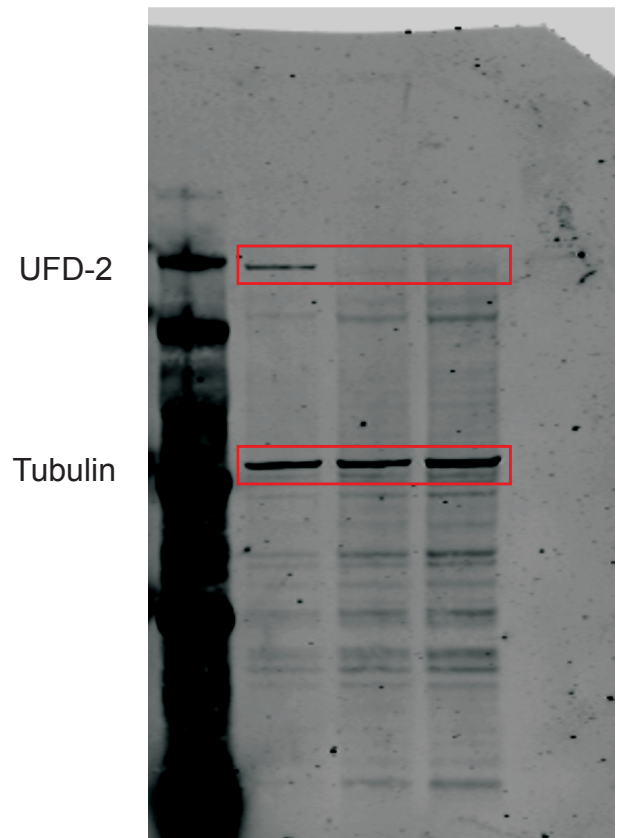

c

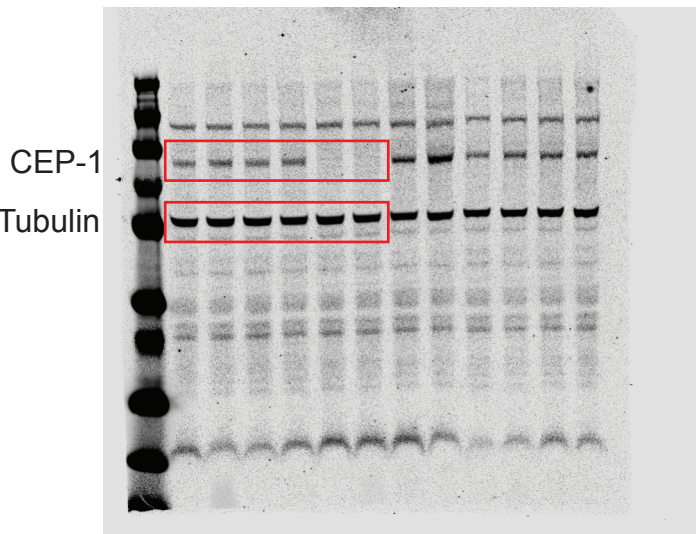

d

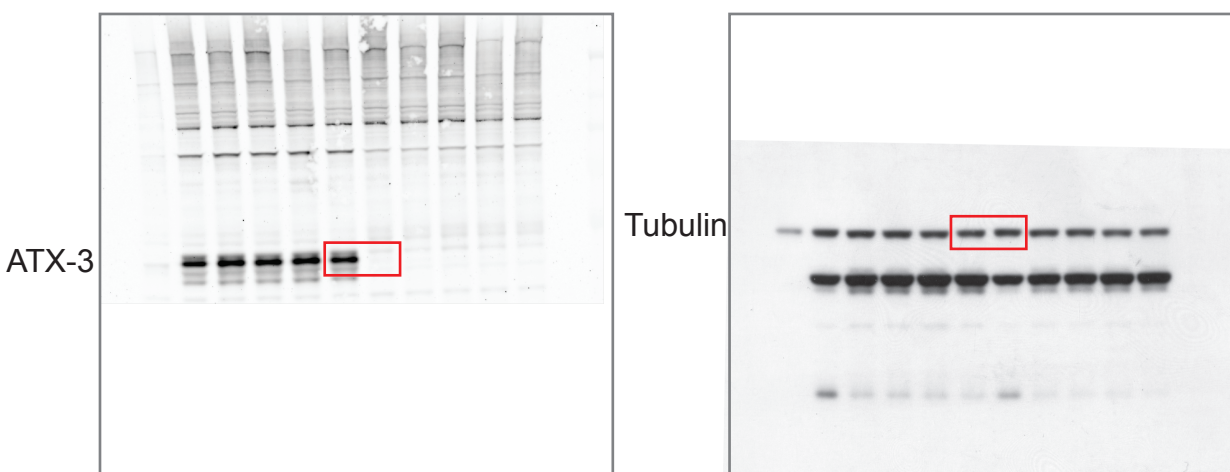

# Supplementary Figure 7, continued

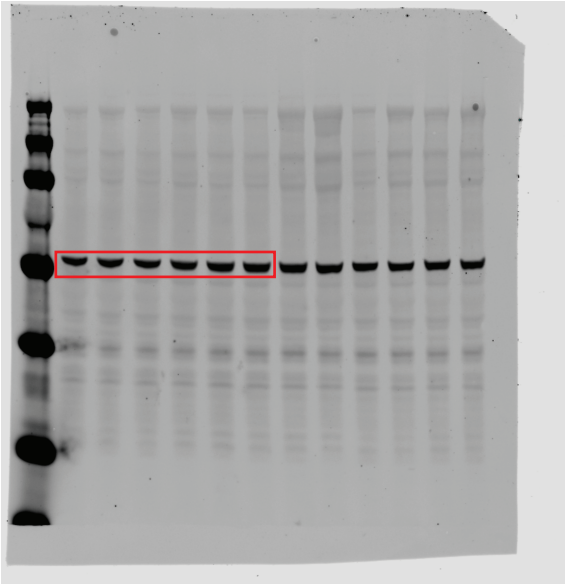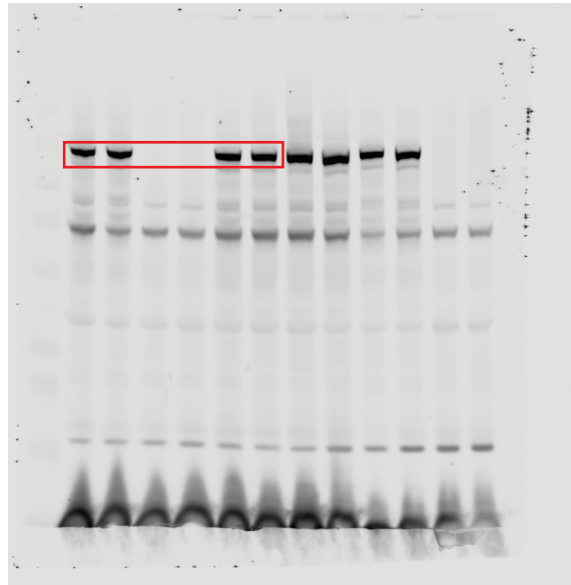

Supplement: NIHMS71379-supplement-Supplementary_Figures.pdf [file NIHMS71379-supplement-Supplementary_Figures.pdf]
