# Supplementary material
Source: PubMed Central journal article supplement (PMC5349472)
Supplement: NIHMS71379-supplement-Supplementary_Tables.pdf [file NIHMS71379-supplement-Supplementary_Tables.pdf]

# Supplementary Table 1

|                                                        | n= |
|--------------------------------------------------------|----|
| <b>Figure 1b</b> wt ( <i>gfp</i> RNAi) 0 Gy 12 hrs     | 3  |
| wt ( <i>gfp</i> RNAi) 0 Gy 24 hrs                      | 10 |
| wt ( <i>gfp</i> RNAi) 0 Gy 36 hrs                      | 10 |
| wt ( <i>gfp</i> RNAi) 30 Gy 12 hrs                     | 6  |
| wt ( <i>gfp</i> RNAi) 30 Gy 24 hrs                     | 5  |
| wt ( <i>gfp</i> RNAi) 30 Gy 36 hrs                     | 9  |
| wt ( <i>gfp</i> RNAi) 60 Gy 12 hrs                     | 5  |
| wt ( <i>gfp</i> RNAi) 60 Gy 24 hrs                     | 6  |
| wt ( <i>gfp</i> RNAi) 60 Gy 36 hrs                     | 11 |
| wt ( <i>gfp</i> RNAi) 120 Gy 12 hrs                    | 2  |
| wt ( <i>gfp</i> RNAi) 120 Gy 24 hrs                    | 10 |
| wt ( <i>gfp</i> RNAi) 120 Gy 36 hrs                    | 11 |
| wt ( <i>ufd-2</i> RNAi) 0 Gy 12 hrs                    | 3  |
| wt ( <i>ufd-2</i> RNAi) 0 Gy 24 hrs                    | 6  |
| wt ( <i>ufd-2</i> RNAi) 0 Gy 36 hrs                    | 6  |
| wt ( <i>ufd-2</i> RNAi) 30 Gy 12 hrs                   | 4  |
| wt ( <i>ufd-2</i> RNAi) 30 Gy 24 hrs                   | 9  |
| wt ( <i>ufd-2</i> RNAi) 30 Gy 36 hrs                   | 8  |
| wt ( <i>ufd-2</i> RNAi) 60 Gy 12 hrs                   | 4  |
| wt ( <i>ufd-2</i> RNAi) 60 Gy 24 hrs                   | 7  |
| wt ( <i>ufd-2</i> RNAi) 60 Gy 36 hrs                   | 6  |
| wt ( <i>ufd-2</i> RNAi) 120 Gy 12 hrs                  | 2  |
| wt ( <i>ufd-2</i> RNAi) 120 Gy 24 hrs                  | 6  |
| wt ( <i>ufd-2</i> RNAi) 120 Gy 36 hrs                  | 9  |
| <b>Figure 1d</b> wt 0 Gy                               | 80 |
| wt 30 Gy                                               | 69 |
| wt 60 Gy                                               | 73 |
| <i>ufd-2(tm1380)</i> 0 Gy                              | 76 |
| <i>ufd-2(tm1380)</i> 30 Gy                             | 80 |
| <i>ufd-2(tm1380)</i> 60 Gy                             | 74 |
| <i>ufd-2(hh1)</i> 0 Gy                                 | 73 |
| <i>ufd-2(hh1)</i> 30 Gy                                | 75 |
| <i>ufd-2(hh1)</i> 60 Gy                                | 80 |
| <b>Figure 1f</b> wt 0 Gy                               | 53 |
| wt 60 Gy                                               | 43 |
| <i>ufd-2(tm1380)</i> 0 Gy                              | 59 |
| <i>ufd-2(tm1380)</i> 60 Gy                             | 37 |
| wt; <i>UFD-2::GFP</i> 0 Gy                             | 63 |
| wt; <i>UFD-2::GFP</i> 60 Gy                            | 38 |
| <i>ufd-2(tm1380); UFD-2::GFP</i> 0 Gy                  | 58 |
| <i>ufd-2(tm1380); UFD-2::GFP</i> 60 Gy                 | 36 |
| wt; <i>UFD-2::GFP<sup>P951A</sup></i> 0 Gy             | 56 |
| wt; <i>UFD-2::GFP<sup>P951A</sup></i> 60 Gy            | 57 |
| <i>ufd-2(tm1380); UFD-2::GFP<sup>P951A</sup></i> 0 Gy  | 52 |
| <i>ufd-2(tm1380); UFD-2::GFP<sup>P951A</sup></i> 60 Gy | 52 |

|                                                        | n=  |
|--------------------------------------------------------|-----|
| <b>Figure 2b</b> wt 0 Gy                               | 231 |
| wt 60 Gy                                               | 280 |
| <b>Figure 2d</b> <i>ufd-2(tm1380); UFD-2::GFP</i> 0 Gy | 34  |
| <i>ufd-2(tm1380); UFD-2::GFP</i> 60 Gy                 | 51  |
| <i>ufd-2(tm1380); UFD-2::GFP<sup>P951A</sup></i> 0 Gy  | 36  |
| <i>ufd-2(tm1380); UFD-2::GFP<sup>P951A</sup></i> 60 Gy | 42  |
| <b>Figure 3d</b> wt 0 Gy                               | 87  |
| wt 60 Gy                                               | 107 |
| <i>hecd-1(tm2371)</i> 0 Gy                             | 57  |
| <i>hecd-1(tm2371)</i> 60 Gy                            | 52  |
| <i>atx-3(gk193)</i> 0 Gy                               | 36  |
| <i>atx-3(gk193)</i> 60 Gy                              | 53  |
| <b>Figure 3e</b> wt 0 Gy                               | 48  |
| wt 60 Gy                                               | 45  |
| <i>ufd-2(tm1380)</i> 0 Gy                              | 47  |
| <i>ufd-2(tm1380)</i> 60 Gy                             | 52  |
| <i>hecd-1(tm2371)</i> 0 Gy                             | 46  |
| <i>hecd-1(tm2371)</i> 60 Gy                            | 39  |
| <i>ufd-2(tm1380); hecd-1(tm2371)</i> 0 Gy              | 42  |
| <i>ufd-2(tm1380); hecd-1(tm2371)</i> 60 Gy             | 41  |
| <b>Figure 3f</b> wt 0 Gy                               | 51  |
| wt 60 Gy                                               | 38  |
| <i>ufd-2(tm1380)</i> 0 Gy                              | 44  |
| <i>ufd-2(tm1380)</i> 60 Gy                             | 42  |
| <i>atx-3(gk193)</i> 0 Gy                               | 42  |
| <i>atx-3(gk193)</i> 60 Gy                              | 44  |
| <i>ufd-2(tm1380); atx-3(gk193)</i> 0 Gy                | 41  |
| <i>ufd-2(tm1380); atx-3(gk193)</i> 60 Gy               | 39  |
| <b>Figure 4d</b> wt 0 Gy                               | 39  |
| wt 20 Gy 1 h                                           | 40  |
| wt 20 Gy 7 hrs                                         | 37  |
| wt 20 Gy 16 hrs                                        | 35  |
| wt 20 Gy 48 hrs                                        | 37  |
| <i>ufd-2(tm1380)</i> 0 Gy                              | 41  |
| <i>ufd-2(tm1380)</i> 20 Gy 1 h                         | 43  |
| <i>ufd-2(tm1380)</i> 20 Gy 7 hrs                       | 36  |
| <i>ufd-2(tm1380)</i> 20 Gy 16 hrs                      | 36  |
| <i>ufd-2(tm1380)</i> 20 Gy 48 hrs                      | 39  |
| <b>Figure 5b</b> wt 0 Gy                               | 122 |
| wt 60 Gy                                               | 106 |
| <i>rad-51(ok2218)</i> 0 Gy                             | 93  |
| <i>rad-51(ok2218)</i> 60 Gy                            | 76  |
| <i>gen-1(tm2940)</i> 0 Gy                              | 74  |
| <i>gen-1(tm2940)</i> 60 Gy                             | 92  |

# Supplementary Table 1, continued

|                                               | n=  |
|-----------------------------------------------|-----|
| <b>Figure 5c</b> wt 0 Gy                      | 130 |
| wt 60 Gy                                      | 150 |
| <i>cep-1(lg1250)</i> 0 Gy                     | 57  |
| <i>cep-1(lg1250)</i> 60 Gy                    | 63  |
| <i>gld-1(op236)</i> 0 Gy                      | 146 |
| <i>gld-1(op236)</i> 60 Gy                     | 162 |
| <i>gld-1(op236); cep-1(lg1250)</i> 0 Gy       | 45  |
| <i>gld-1(op236); cep-1(lg1250)</i> 60 Gy      | 50  |
| <i>egl-1(n1084n3082); ced-13(tm536)</i> 0 Gy  | 55  |
| <i>egl-1(n1084n3082); ced-13(tm536)</i> 60 Gy | 63  |
| <b>Figure 5d</b> wt 0 Gy                      | 35  |
| wt 20 Gy                                      | 63  |
| <i>ufd-2(tm1380)</i> 0 Gy                     | 39  |
| <i>ufd-2(tm1380)</i> 20 Gy                    | 40  |
| <i>ufd-2(tm1380); UFD-2::GFP</i> 0 Gy         | 38  |
| <i>ufd-2(tm1380); UFD-2::GFP</i> 20 Gy        | 38  |
| <i>RAD-51::GFP</i> 0 Gy                       | 36  |
| <i>RAD-51::GFP</i> 20 Gy                      | 34  |
| <b>Figure 5e</b> wt 0 Gy                      | 71  |
| wt 60 Gy                                      | 74  |
| <i>ufd-2(tm1380)</i> 0 Gy                     | 73  |
| <i>ufd-2(tm1380)</i> 60 Gy                    | 65  |
| <i>ufd-2(tm1380); UFD-2::GFP</i> 0 Gy         | 74  |
| <i>ufd-2(tm1380); UFD-2::GFP</i> 60 Gy        | 82  |
| <i>RAD-51::GFP</i> 0 Gy                       | 61  |
| <i>RAD-51::GFP</i> 60 Gy                      | 67  |

# Supplementary Table 2

|                                |                                     | n=  |
|--------------------------------|-------------------------------------|-----|
| <b>Supplementary Figure 1a</b> | <i>ced-1(e1735)</i>                 | 38  |
|                                | <i>ced-1(e1735); ufd-2(tm 1380)</i> | 33  |
| <b>Supplementary Figure 1b</b> | wt                                  | 45  |
|                                | <i>ufd-2(tm 1380)</i>               | 45  |
|                                | <i>gla-3(op216)</i>                 | 44  |
|                                | <i>gla-3(op216); ufd-2(tm 1380)</i> | 45  |
| <b>Supplementary Figure 1d</b> | wt 0 Gy                             | 30  |
|                                | wt 60 Gy                            | 32  |
|                                | <i>ufd-2(tm 1380)</i> 0 Gy          | 33  |
|                                | <i>ufd-2(tm 1380)</i> 60 Gy         | 33  |
|                                | <i>hus-1(op244)</i> 0 Gy            | 25  |
|                                | <i>hus-1(op244)</i> 60 Gy           | 23  |
|                                |                                     |     |
| <b>Supplementary Figure 2c</b> | wt 5 hrs 0 Gy                       | 31  |
|                                | wt 5 hrs 60 Gy                      | 32  |
|                                | wt 24 hrs 0 Gy                      | 20  |
|                                | wt 24 hrs 60 Gy                     | 17  |
| <b>Supplementary Figure 3a</b> | wt 0 Gy                             | 79  |
|                                | wt 60 Gy                            | 69  |
|                                | wt 600 J/m <sup>2</sup>             | 96  |
| <b>Supplementary Figure 3b</b> | wt 0 Gy                             | 147 |
|                                | wt 30 Gy                            | 147 |
|                                | wt 60 Gy                            | 144 |
|                                | <i>ufd-2(tm 1380)</i> 0 Gy          | 144 |
|                                | <i>ufd-2(tm 1380)</i> 30 Gy         | 144 |
|                                | <i>ufd-2(tm 1380)</i> 60 Gy         | 144 |
|                                | <i>ufd-2(hh1)</i> 0 Gy              | 75  |
|                                | <i>ufd-2(hh1)</i> 30 Gy             | 75  |
|                                | <i>ufd-2(hh1)</i> 60 Gy             | 75  |
|                                | <i>rad-51(ok2218)het.</i> 0 Gy      | 111 |
|                                | <i>rad-51(ok2218)het.</i> 30 Gy     | 117 |
|                                | <i>rad-51(ok2218)het.</i> 60 Gy     | 117 |
| <b>Supplementary Figure 4e</b> | wt 0 Gy                             | 35  |
|                                | wt 20 Gy                            | 42  |
|                                | <i>atx-3(gk193)</i> 0 Gy            | 43  |
|                                | <i>atx-3(gk193)</i> 20 Gy           | 48  |
